# Supplementary material for: An Investigation on the Correlation between the Mechanical Properties of Human Skull Bone, Its Geometry, Microarchitectural Properties, and Water Content
Source: Hindawi journal article supplement (doi:10.1155/2019/6515797), 2019-05-23
Supplement: f1 [file 6515797.f1.pdf]

**Supplemental Table 1.** Different properties of skull bone reported in more recent literature.

|                                  | <b>Delille et al. (2007) [5]</b> | <b>Motherway et al. (2009) [6]</b> | <b>Auperrin et al. (2014) [7]</b> | <b>Rahmoun et al. (2014) [8]</b> | <b>Torimitsu et al. (2015) [9]</b> |
|----------------------------------|----------------------------------|------------------------------------|-----------------------------------|----------------------------------|------------------------------------|
| <b>Testing scenario</b>          | Three-point bending              | Three-point bending                | Three-point bending               | Three-point bending              | Three-point bending                |
| <b>Velocity</b>                  | 10 mm/min                        | 0.5, 1, 2.5 m/s                    | 10 mm/min                         | 10 mm/min                        | 6 mm/min                           |
| <b>Properties</b>                |                                  |                                    |                                   |                                  |                                    |
| <b>Elastic modulus (in GPa)</b>  | 3.6-11.3                         | 4.4-18.1                           | 3.8-9.8                           | 2.0-6.0                          | <i>Not reported</i>                |
| <b>Bending strength (in MPa)</b> | <i>Not reported</i>              | 78.2-133.6                         | <i>Not reported</i>               | <i>Not reported</i>              | 64.3-85.8                          |
| <b>Stiffness (in N/mm)</b>       | <i>Not reported</i>              | <i>Not reported</i>                | <i>Not reported</i>               | 265-640                          | <i>Not reported</i>                |
